# Supplementary material
Source: Springer Nature journal article supplement (https://www.springermedizin.de/resource/supplementary/13011_2007_82_MOESM2_ESM.pdf/9628354)

**Odds Ratio N-SUD vs. SUD, Driving Related Events**  
**- Categorical Variables**

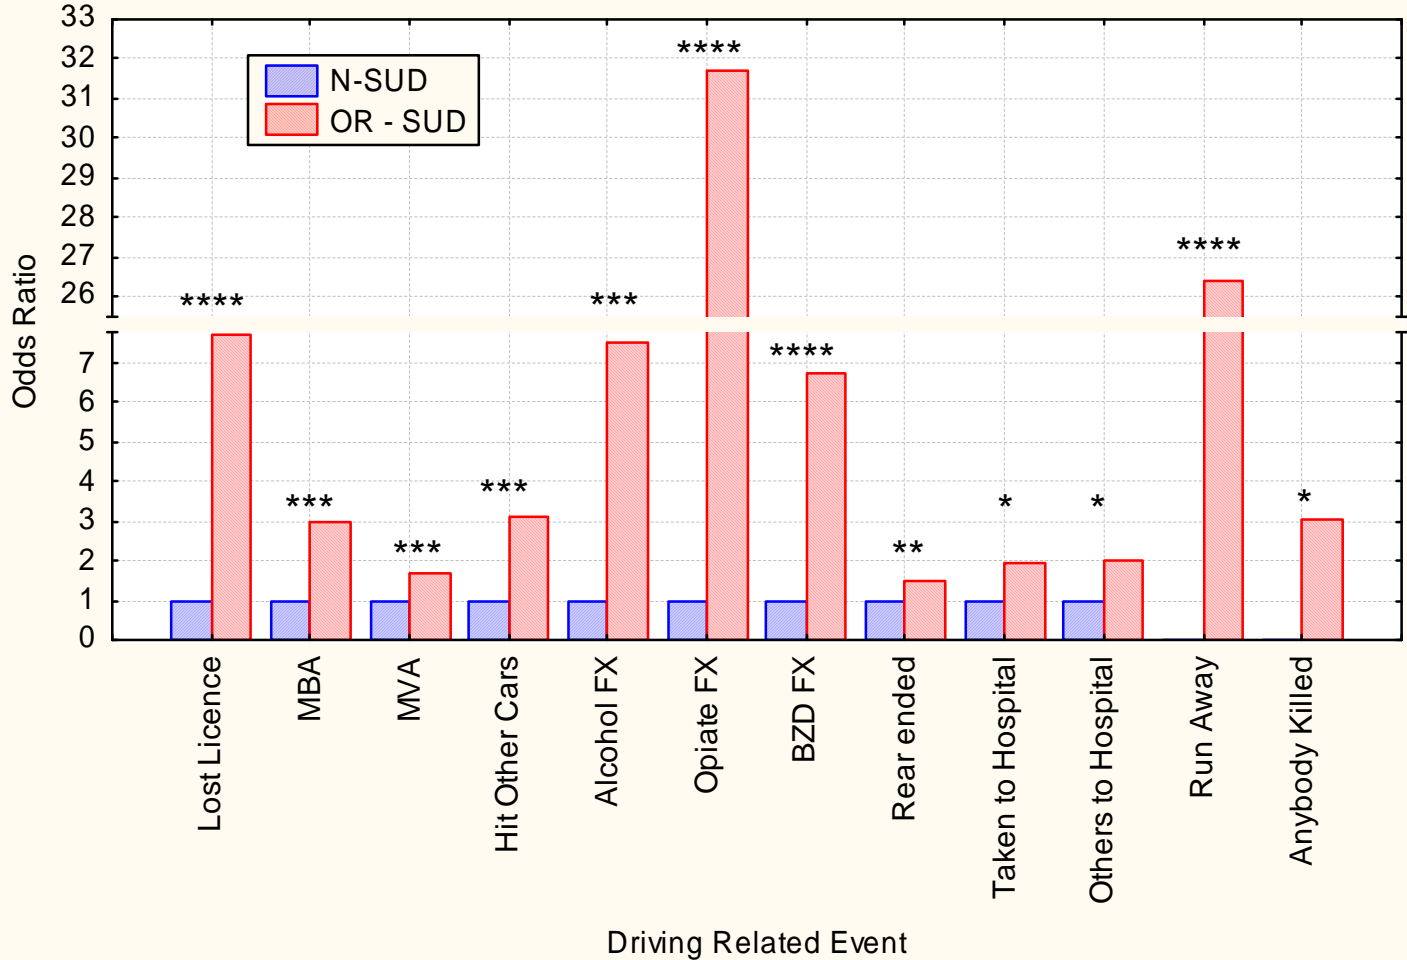

Supplement: MOESM2 [file 9628354]
